# Supplementary material for: Relationship between sustainable development and financial development from the perspective of the European green economy. Fuzzy approach
Source: Frontiers journal article supplement (doi:10.3389/fenvs.2023.1244119), 2023-08-25
Supplement: Table_1.XLSX [file Table_1.XLSX]

## Sheet: Info
	variable	indicators	source
1	Eco-innovation index	The Eco-Innovation Index measures the environmental innovation performance of EU Member States, on the basis of the 12 indicators included in the measurement framework.	https://green-business.ec.europa.eu/eco-innovation_en
2	Financial Development Index	The dataset contains nine indices that summarize how developed financial institutions and financial markets are in terms of their depth, access, and efficiency. These indices are aggregated into an overall index of financial development	https://db.nomics.world/IMF/FDI
3	Shares of environmental in total tax revenues, % of total taxes, Total environmental taxes	Share of environmental taxes in total revenues from taxes and social contributions	https://ec.europa.eu/eurostat/databrowser/view/SDG_17_50/default/table
3b	Environmental tax revenues [ENV_AC_TAX]	Percentage of total revenues from taxes and social contributions (including imputed social contributions)	https://ec.europa.eu/eurostat/databrowser/view/ENV_AC_TAX/default/table?lang=en
		Percentage of gross domestic product (GDP)
4	Research and development expenditure (% of GDP)	Business enterprise sector	https://ec.europa.eu/eurostat/databrowser/view/SDG_09_10/default/table
		Government sector
		Higher education sector
		Private non-profit sector
5	Sustainable Development Index (SDI)	The SDI is an efficiency metric, designed to assess the ecological efficiency of nations in delivering human development	https://www.sustainabledevelopmentindex.org/time-series
5b	SDG Index	The overall score measures the total progress towards achieving all 17 SDGs. The score can be interpreted as a percentage of SDG achievement. A score of 100 indicates that all SDGs have been achieved	https://dashboards.sdgindex.org/explorer?metric=overall
6	Green Growth Index	Green Growth Index measures country performance in achieving sustainability targets including Sustainable Development Goals, Paris Climate Agreement, and Aichi Biodiversity Targets for four green growth dimensions: efficient and sustainable resource use, natural capital protection, green economic opportunities and social inclusion.	https://gggi-simtool-demo.herokuapp.com/SimulationDashBoard/country-profile/
7	International Tax Competitiveness Index	The International Tax Competitiveness Index (ITCI) seeks to measure the extent to which a country’s tax system adheres to two important aspects of tax policy: competitiveness and neutrality.	https://taxfoundation.org/publications/international-tax-competitiveness-index/
8	Gini coefficient of equivalized disposable income before social transfers (pensions excluded from social transfers)	Gini coefficient (scale from 0 to 100)	https://ec.europa.eu/eurostat/databrowser/view/ILC_DI12C/bookmark/table?lang=en&bookmarkId=a5388334-5b9d-4749-84cd-82cb7f75798c
9	Human Development Index	A summary measure of average achievement in key dimensions of human development: a long and healthy life, being knowledgeable and having a decent standard of living. The HDI is the geometric mean of normalized indices for each of the three dimensions	https://hdr.undp.org/data-center/human-development-index#/indicies/HDI
			https://hdr.undp.org/sites/default/files/2021-22_HDR/HDR21-22_Composite_indices_complete_time_series.csv

## Sheet: 2013
		1-Eco-Innovation Index	2-FDI	3 - Share of environmental taxes in total tax revenues [SDG_17_50]	3b - Environmental tax revenues [ENV_AC_TAX]		4 - Gross domestic expenditure on R&D by sector [SDG_09_10]				5-Sustainable Development Index (SDI)	5b-SDG Index	6-Green Growth Index	7-International Tax Competitiveness Index	8-Gini coefficient of equivalized disposable income before social transfers (pensions excluded from social transfers)	9-Human Development Index
			Financial Development Index	Share of environmental taxes in total revenues from taxes and social contributions	Percentage of total revenues from taxes and social contributions (including imputed social contributions)	Percentage of gross domestic product (GDP)	Business enterprise sector	Government sector	Higher education sector	Private non-profit sector					Gini coefficient (scale from 0 to 100)
				%	%	%	% of GDP	% of GDP	% of GDP	% of GDP	-	-	-	-	0 - 100	-
1	European Union	100	0.51539	6.2	6.02	2.47	1.34	0.26	0.48	0.01	b.d.	b.d.	b.d.	b.d.	36.3	b.d.
2	Belgium	75.91	0.662898	5.48	5.19	2.52	1.62	0.2	0.51	0.01	0.498	78.17	62.41	b.d.	34	0.916
3	Bulgaria	25.18	0.367936	10.15	10.15	2.86	0.39	0.19	0.05	0	0.802	73.67	62.29	b.d.	38.1	0.805
4	Czechia	92.61	0.471338	5.99	5.98	2.09	1	0.36	0.51	0.01	0.535	77.77	74.23	b.d.	28.8	0.881
5	Denmark	151.84	0.715241	8.95	8.76	4.14	1.88	0.07	1.01	0.01	0.392	84.59	74.13	b.d.	37.6	0.933
6	Germany	109.83	0.713938	5.36	5.17	2.06	1.91	0.42	0.51	b.d.	0.458	79.92	71.96	b.d.	36.2	0.934
7	Estonia	98.59	0.290182	8.09	8.04	2.56	0.82	0.15	0.73	0.02	0.3	76.99	66.31	b.d.	36.3	0.88
8	Ireland	77.28	0.709041	8.61	8.28	2.48	1.13	0.07	0.37	b.d.	0.473	79.81	59.53	b.d.	46.5	0.908
9	Greece	55.94	0.580733	10.2	9.45	3.66	0.27	0.23	0.31	0.01	0.362	72.76	63.43	b.d.	37	0.871
10	Spain	104.47	0.843083	5.8	5.63	1.92	0.68	0.24	0.36	0	0.573	77.07	65.12	b.d.	38.8	0.88
11	France	109.58	0.747543	4.45	4.26	2.03	1.44	0.29	0.47	0.03	0.584	79.08	68.85	b.d.	35.8	0.887
12	Croatia	64.16	0.485611	7.8	7.8	2.81	0.4	0.2	0.19	b.d.	0.751	76.65	66.5	b.d.	37.3	0.838
13	Italy	102.55	0.742718	7.93	7.88	3.43	0.71	0.18	0.37	0.04	0.612	77.34	69.51	b.d.	35.2	0.882
14	Cyprus	68.3	0.489387	8.56	8.56	2.72	0.09	0.07	0.26	0.06	0.396	70.97	59.74	b.d.	35.5	0.861
15	Latvia	80.06	0.260755	10.81	10.71	3.17	0.17	0.18	0.26	b.d.	0.676	77.54	67.75	b.d.	38.3	0.843
16	Lithuania	66.24	0.216153	6.23	6.16	1.68	0.24	0.19	0.52	b.d.	0.414	73.81	66.65	b.d.	40.2	0.854
17	Luxembourg	150.74	0.721413	5.66	5.46	2.05	0.65	0.36	0.23	b.d.	b.d.	73.81	67.17	b.d.	38.1	0.921
18	Hungary	52.64	0.470409	6.32	6.31	2.44	0.96	0.21	0.2	b.d.	0.808	76.37	69.85	b.d.	35.4	0.84
19	Malta	51.58	0.539449	8.24	7.97	2.59	0.38	0.07	0.29	b.d.	0.461	73.12	45.56	b.d.	32.8	0.872
20	Netherlands	95.1	0.732836	9.05	8.91	3.26	1.41	0.13	0.62	0	0.345	78.67	65.04	b.d.	31.4	0.929
21	Austria	137.27	0.614288	5.58	5.49	2.38	2.09	0.13	0.72	0.01	0.288	80.67	76.53	b.d.	33.3	0.905
22	Poland	46.45	0.459033	7.55	7.32	2.45	0.38	0.24	0.26	0	0.51	76.87	64.99	b.d.	33.9	0.863
23	Portugal	82.18	0.683278	6.49	5.94	2.2	0.63	0.09	0.59	0.02	0.683	76.11	67.33	b.d.	38.4	0.845
24	Romania	86.16	0.292515	7.52	7.52	2.07	0.12	0.19	0.08	0	0.765	75.43	67.23	b.d.	37.9	0.81
25	Slovenia	89.74	0.436355	10.45	10.36	3.92	1.96	0.33	0.27	0	0.556	78.5	65.71	b.d.	30.6	0.9
26	Slovakia	68.13	0.28551	8.16	8.11	2.51	0.38	0.17	0.27	0	0.327	75.92	72.09	b.d.	28.3	0.848
27	Finland	168.67	0.665157	6.71	6.69	2.91	2.25	0.29	0.7	0.02	0.28	86	70.68	b.d.	33.6	0.926
28	Sweden	152.99	0.807086	5.46	5.39	2.32	2.25	0.12	0.89	0.01	0.364	85.16	74.07	b.d.	35	0.932
	b.d. = brak danych

## Sheet: 2014
		1-Eco-Innovation Index	2-FDI	3 - Share of environmental taxes in total tax revenues [SDG_17_50]	3b - Environmental tax revenues [ENV_AC_TAX]		4 - Gross domestic expenditure on R&D by sector [SDG_09_10]				5-Sustainable Development Index (SDI)	5b-SDG Index	6-Green Growth Index	7-International Tax Competitiveness Index	8-Gini coefficient of equivalized disposable income before social transfers (pensions excluded from social transfers)	9-Human Development Index
			Financial Development Index	Share of environmental taxes in total revenues from taxes and social contributions	Percentage of total revenues from taxes and social contributions (including imputed social contributions)	Percentage of gross domestic product (GDP)	Business enterprise sector	Government sector	Higher education sector	Private non-profit sector					Gini coefficient (scale from 0 to 100)
				%	%	%	% of GDP	% of GDP	% of GDP	% of GDP	-	-	-	-	0 - 100	-
1	European Union	103.52	0.512425	6.2	6.02	2.47	1.35	0.26	0.48	0.01	b.d.	b.d.	b.d.		36.6	b.d.
2	Belgium	82.88	0.640516	5.57	5.28	2.54	1.66	0.21	0.49	0.01	0.496	78.52	63.36	71.4767	34.5	0.921
3	Bulgaria	29.42	0.348789	9.99	9.99	2.84	0.52	0.2	0.07	0.01	0.796	73.11	62.11	b.d.	38	0.807
4	Czechia	93.46	0.468316	6.21	6.21	2.12	1.08	0.37	0.5	0.01	0.527	78.41	74.62	82.8857	29.6	0.887
5	Denmark	159.14	0.684195	8.17	8.02	4	1.86	0.07	0.98	0.01	0.399	84.75	74.49	59.0677	38.2	0.932
6	Germany	113.43	0.715474	5.2	5.03	1.99	1.95	0.42	0.51	b.d.	0.446	80.35	72.46	71.6839	37.1	0.937
7	Estonia	89.93	0.274718	8.27	8.22	2.66	0.62	0.16	0.63	0.02	0.298	77.37	67.01	100	39.2	0.879
8	Ireland	78.38	0.693767	8.33	8.01	2.4	1.08	0.07	0.37	b.d.	0.472	80.32	59.5	62.0147	45.5	0.914
9	Greece	60.59	0.609487	10.29	9.48	3.74	0.28	0.23	0.31	0.01	0.369	73.35	63.9	62.9245	37	0.879
10	Spain	106.29	0.877284	5.52	5.39	1.87	0.66	0.23	0.35	0	0.558	77.96	65.56	56.4631	39.9	0.884
11	France	109.07	0.759487	4.45	4.26	2.03	1.45	0.29	0.46	0.03	0.596	79.32	69.07	39.1349	35.1	0.892
12	Croatia	71.37	0.485884	8.66	8.66	3.14	0.37	0.2	0.2	b.d.	0.749	77.07	66.87	b.d.	36.5	0.841
13	Italy	109.2	0.764839	8.32	8.26	3.57	0.76	0.18	0.36	0.04	0.612	77.15	70.38	56.171	34.8	0.883
14	Cyprus	68.16	0.478336	9.09	9.09	3.06	0.11	0.07	0.25	0.08	0.374	71.02	58.21	b.d.	37.5	0.865
15	Latvia	81.25	0.242107	11.28	11.16	3.34	0.24	0.17	0.28	b.d.	0.651	77.72	68.77	83.7936	38.5	0.846
16	Lithuania	71.09	0.211551	6.31	6.24	1.73	0.32	0.18	0.54	b.d.	0.407	74.05	67.44	79.8103	39.4	0.861
17	Luxembourg	164.79	0.73456	5.23	5.05	1.89	0.64	0.36	0.21	b.d.	b.d.	74.32	67.88	84.527	35.5	0.926
18	Hungary	60.33	0.429812	6.26	6.25	2.41	0.96	0.18	0.18	b.d.	0.793	76.68	70.02	73.0698	35.4	0.838
19	Malta	50.77	0.529513	8.7	8.42	2.74	0.38	0.07	0.24	b.d.	0.472	73.97	44.13	b.d.	32.5	0.881
20	Netherlands	100.04	0.723532	8.93	8.8	3.31	1.41	0.13	0.63	0	0.349	78.87	65.36	76.0836	32.3	0.931
21	Austria	144.8	0.602319	5.59	5.51	2.39	2.2	0.14	0.73	0.01	0.289	80.78	76.78	72.7329	33.9	0.909
22	Poland	49.34	0.447481	8.05	7.81	2.6	0.44	0.23	0.28	0	0.503	78	65.29	67.8204	34	0.865
23	Portugal	84.66	0.739831	6.65	6.14	2.27	0.6	0.08	0.59	0.02	0.677	76.4	67.33	52.1711	38.7	0.848
24	Romania	87.58	0.258532	8.66	8.66	2.38	0.16	0.16	0.06	0	0.756	74.92	67.43	b.d.	38.2	0.811
25	Slovenia	91.86	0.383636	10.31	10.23	3.86	1.83	0.29	0.25	0	0.56	79.17	66.4	70.5856	31	0.902
26	Slovakia	74.14	0.283832	7.98	7.93	2.53	0.32	0.25	0.3	0	0.326	76.68	72.9	79.0555	30	0.849
27	Finland	176.61	0.643411	6.62	6.6	2.88	2.13	0.27	0.72	0.02	0.29	86.06	70.88	66.9831	34.1	0.927
28	Sweden	157.9	0.801151	5.16	5.09	2.17	2.08	0.12	0.9	0.01	0.366	85.22	75.11	74.95	36.3	0.935
	b.d. = brak danych

## Sheet: 2015
		1-Eco-Innovation Index	2-FDI	3 - Share of environmental taxes in total tax revenues [SDG_17_50]	3b - Environmental tax revenues [ENV_AC_TAX]		4 - Gross domestic expenditure on R&D by sector [SDG_09_10]				5-Sustainable Development Index (SDI)	5b-SDG Index	6-Green Growth Index	7-International Tax Competitiveness Index	8-Gini coefficient of equivalized disposable income before social transfers (pensions excluded from social transfers)	9-Human Development Index
			Financial Development Index	Share of environmental taxes in total revenues from taxes and social contributions	Percentage of total revenues from taxes and social contributions (including imputed social contributions)	Percentage of gross domestic product (GDP)	Business enterprise sector	Government sector	Higher education sector	Private non-profit sector					Gini coefficient (scale from 0 to 100)
				%	%	%	% of GDP	% of GDP	% of GDP	% of GDP	-	-	-	-	0 - 100	-
1	European Union	105.33	0.511781	6.16	5.99	2.45	1.37	0.26	0.48	0.01	b.d.	b.d.	b.d.	b.d.	36.5	b.d.
2	Belgium	82.24	0.683611	5.66	5.38	2.55	1.7	0.22	0.49	0.01	0.46	78.63	63.81	70.8545	34.6	0.924
3	Bulgaria	31.65	0.362491	10.23	10.23	2.95	0.7	0.2	0.05	0.01	0.779	73.34	62.17	b.d.	40.1	0.809
4	Czechia	97.91	0.471487	5.98	5.98	2.05	1.04	0.39	0.48	0.01	0.492	79.07	74.36	82.3372	29.4	0.891
5	Denmark	158.3	0.684153	8.57	8.4	3.97	1.94	0.07	1.04	0.01	0.394	85.33	74.79	59.4316	37.2	0.936
6	Germany	115.9	0.73992	4.95	4.79	1.92	2.01	0.41	0.51	b.d.	0.424	81.64	73.68	71.37	36.3	0.938
7	Estonia	96.53	0.28442	8.19	8.13	2.73	0.68	0.16	0.61	0.03	0.322	78.44	67.69	100	38.1	0.882
8	Ireland	82.84	0.670835	8.15	7.86	1.89	0.85	0.05	0.28	b.d.	0.449	79.73	59.42	60.8089	42.7	0.925
9	Greece	70.3	0.542824	10.46	9.62	3.83	0.32	0.27	0.37	0.01	0.356	73.83	64.15	58.5966	36.5	0.88
10	Spain	105.62	0.875562	5.7	5.57	1.93	0.64	0.23	0.34	0	0.517	77.78	67.17	58.521	39.4	0.889
11	France	111.89	0.792947	4.73	4.53	2.16	1.44	0.29	0.46	0.03	0.566	79.52	69.33	39.6508	35.3	0.892
12	Croatia	72.68	0.478335	9.12	9.06	3.32	0.42	0.2	0.2	b.d.	0.733	77.25	67.31	b.d.	36.8	0.843
13	Italy	115.04	0.777227	7.92	7.86	3.39	0.78	0.18	0.34	0.04	0.585	77.1	70.64	52.9566	34.8	0.882
14	Cyprus	65.39	0.466636	9.17	9.17	3.03	0.11	0.06	0.24	0.07	0.357	71.77	57.9	b.d.	37.2	0.871
15	Latvia	87.35	0.2393	11.75	11.62	3.5	0.15	0.16	0.31	b.d.	0.62	78.04	68.56	83.3833	37.9	0.85
16	Lithuania	73.13	0.210309	6.4	6.33	1.85	0.29	0.18	0.58	b.d.	0.373	74.63	68.05	79.4536	42.1	0.862
17	Luxembourg	174.95	0.719081	5.05	4.87	1.76	0.66	0.36	0.23	b.d.	b.d.	74.48	67.96	83.9892	34.7	0.915
18	Hungary	77.62	0.425616	6.37	6.36	2.47	0.98	0.18	0.16	b.d.	0.779	76.93	70.12	71.8055	34.3	0.838
19	Malta	57.81	0.541124	9.12	8.84	2.7	0.37	0.12	0.23	b.d.	0.558	73.79	46.64	b.d.	32.6	0.889
20	Netherlands	102.99	0.716587	8.99	8.86	3.32	1.38	0.13	0.64	0	0.322	79.56	65.79	74.3802	32.8	0.932
21	Austria	147.84	0.604479	5.51	5.43	2.38	2.18	0.14	0.72	0.01	0.278	80.92	77.04	72.7984	33.6	0.91
22	Poland	51.07	0.451712	8.17	7.93	2.65	0.47	0.24	0.29	0	0.465	78.68	65.06	63.7147	33.8	0.868
23	Portugal	89.07	0.685945	7.03	6.54	2.42	0.58	0.08	0.57	0.02	0.651	76.61	68.01	54.1707	37.8	0.85
24	Romania	88.27	0.281904	8.79	8.79	2.47	0.21	0.19	0.09	0	0.744	75.69	67.23	b.d.	40.4	0.813
25	Slovenia	95.82	0.359524	10.34	10.26	3.88	1.67	0.3	0.22	0	0.527	78.97	67.13	69.5526	30.3	0.903
26	Slovakia	77.34	0.286019	7.7	7.65	2.49	0.32	0.32	0.51	0	0.305	76.91	73.54	76.1946	27.3	0.851
27	Finland	176.7	0.657447	6.65	6.63	2.89	1.91	0.23	0.7	0.02	0.287	86.41	71.15	67.2405	33.9	0.93
28	Sweden	156.95	0.801011	5.05	4.98	2.15	2.24	0.11	0.86	0.01	0.358	85.29	75.69	73.8179	35.8	0.937
	b.d. = brak danych

## Sheet: 2016
		1-Eco-Innovation Index	2-FDI	3 - Share of environmental taxes in total tax revenues [SDG_17_50]	3b - Environmental tax revenues [ENV_AC_TAX]		4 - Gross domestic expenditure on R&D by sector [SDG_09_10]				5-Sustainable Development Index (SDI)	5b-SDG Index	6-Green Growth Index	7-International Tax Competitiveness Index	8-Gini coefficient of equivalized disposable income before social transfers (pensions excluded from social transfers)	9-Human Development Index
			Financial Development Index	Share of environmental taxes in total revenues from taxes and social contributions	Percentage of total revenues from taxes and social contributions (including imputed social contributions)	Percentage of gross domestic product (GDP)	Business enterprise sector	Government sector	Higher education sector	Private non-profit sector					Gini coefficient (scale from 0 to 100)
				%	%	%	% of GDP	% of GDP	% of GDP	% of GDP	-	-	-	-	0 - 100	-
1	European Union	106.16	0.5089	6.21	6.04	2.47	1.39	0.25	0.47	0.01	b.d.	b.d.	b.d.	b.d.	36.2	b.d.
2	Belgium	87.39	0.648277	6.03	5.72	2.67	1.73	0.24	0.53	0.02	0.393	78.97	64.55	68.0634	34.4	0.927
3	Bulgaria	29.52	0.36957	10.2	10.2	2.98	0.56	0.16	0.04	0	0.737	72.39	62.53	b.d.	40.3	0.809
4	Czechia	103.23	0.46489	5.99	5.99	2.1	1.02	0.3	0.34	0	0.463	79.1	74.84	82.1282	29.2	0.895
5	Denmark	155.34	0.6534	8.55	8.39	3.91	2.01	0.07	1	0.01	0.432	85.38	74.91	58.8055	36.9	0.943
6	Germany	120.16	0.715227	4.76	4.6	1.86	2	0.41	0.53	b.d.	0.404	81.94	73.97	70.9475	35.9	0.941
7	Estonia	98.32	0.278449	8.85	8.79	2.97	0.64	0.14	0.44	0.02	0.324	78.25	68.04	100	36.2	0.885
8	Ireland	87.63	0.673186	8.02	7.71	1.89	0.85	0.05	0.28	b.d.	0.418	79.45	59.69	59.6473	41.7	0.929
9	Greece	69.1	0.517388	9.82	9.07	3.81	0.42	0.25	0.32	0.01	0.373	74.18	63.75	52.7817	36.8	0.877
10	Spain	104.55	0.87035	5.54	5.42	1.87	0.64	0.22	0.33	0	0.525	78.42	67.63	62.9953	39.1	0.895
11	France	113.62	0.793838	4.91	4.71	2.24	1.45	0.28	0.46	0.04	0.547	79.61	69.75	40.3476	35.3	0.895
12	Croatia	73.3	0.492685	9.3	9.24	3.42	0.39	0.18	0.28	b.d.	0.729	77.91	67.66	b.d.	34.3	0.848
13	Italy	119.02	0.757255	8.33	8.27	3.51	0.83	0.17	0.33	0.03	0.566	77.25	70.99	51.6255	35.6	0.887
14	Cyprus	70.31	0.466122	9.05	9.05	2.91	0.19	0.06	0.21	0.07	0.336	72.17	57.87	b.d.	36.5	0.877
15	Latvia	95.8	0.246628	11.66	11.53	3.58	0.11	0.14	0.19	b.d.	0.611	78.34	68.34	83.9043	37	0.855
16	Lithuania	78.46	0.209456	6.48	6.41	1.92	0.29	0.22	0.33	b.d.	0.388	74.53	68.58	79.2006	41	0.868
17	Luxembourg	173.33	0.73814	4.67	4.5	1.66	0.7	0.32	0.24	b.d.	b.d.	74.85	68.03	83.5345	35.6	0.923
18	Hungary	58.92	0.433561	6.47	6.46	2.53	0.87	0.16	0.13	b.d.	0.794	77.65	70.32	72.0653	34.2	0.843
19	Malta	60.06	0.514341	8.59	8.34	2.63	0.35	0.01	0.2	b.d.	0.567	74.59	48.47	b.d.	32.8	0.891
20	Netherlands	103.14	0.719386	8.73	8.62	3.35	1.41	0.13	0.61	0	0.333	79.44	66.05	75.6458	32.7	0.933
21	Austria	145.08	0.618205	5.61	5.53	2.34	2.19	0.22	0.69	0.02	0.268	80.91	77.34	73.1602	33.6	0.915
22	Poland	55.25	0.448998	8.11	7.88	2.72	0.63	0.02	0.3	0	0.454	79.38	65.32	61.8845	32.9	0.872
23	Portugal	90.86	0.716693	7.59	7.06	2.58	0.62	0.07	0.57	0.02	0.648	76.93	68.48	54.0651	37.5	0.853
24	Romania	91.36	0.27592	9.27	9.01	2.44	0.27	0.16	0.05	0	0.732	76.64	66.91	b.d.	38.1	0.816
25	Slovenia	94.25	0.358051	10.31	10.23	3.88	1.52	0.27	0.22	0	0.51	79.35	67.71	67.9447	30.1	0.91
26	Slovakia	82.04	0.290558	7.55	7.5	2.48	0.4	0.17	0.22	0	0.301	76.95	73.87	77.2216	27.7	0.854
27	Finland	180.02	0.646064	7.05	7.03	3.08	1.79	0.22	0.68	0.02	0.266	85.6	71.41	68.4799	34.6	0.931
28	Sweden	159.94	0.785609	5.03	4.97	2.22	2.26	0.11	0.87	0.01	0.345	85.15	75.94	73.3017	36.4	0.939
	b.d. = brak danych

## Sheet: 2017
		1-Eco-Innovation Index	2-FDI	3 - Share of environmental taxes in total tax revenues [SDG_17_50]	3b - Environmental tax revenues [ENV_AC_TAX]		4 - Gross domestic expenditure on R&D by sector [SDG_09_10]				5-Sustainable Development Index (SDI)	5b-SDG Index	6-Green Growth Index	7-International Tax Competitiveness Index	8-Gini coefficient of equivalized disposable income before social transfers (pensions excluded from social transfers)	9-Human Development Index
			Financial Development Index	Share of environmental taxes in total revenues from taxes and social contributions	Percentage of total revenues from taxes and social contributions (including imputed social contributions)	Percentage of gross domestic product (GDP)	Business enterprise sector	Government sector	Higher education sector	Private non-profit sector					Gini coefficient (scale from 0 to 100)
				%	%	%	% of GDP	% of GDP	% of GDP	% of GDP	-	-	-	-	0 - 100	-
1	European Union	107.94	0.515955	6.06	5.9	2.42	1.43	0.25	0.47	0.01	b.d.	b.d.	b.d.	b.d.	35.9	b.d.
2	Belgium	88.05	0.688459	6.02	5.72	2.7	1.87	0.25	0.53	0.01	0.37	78.88	64.1	65.4995	34	0.931
3	Bulgaria	30.6	0.372745	9.38	9.38	2.8	0.52	0.17	0.04	0.01	0.715	73.01	62.81	b.d.	43.4	0.808
4	Czechia	98.85	0.465398	5.67	5.67	2.01	1.11	0.3	0.35	0	0.436	79.48	74.74	80.0367	28.2	0.897
5	Denmark	158.41	0.674395	8.02	7.88	3.67	1.86	0.09	0.97	0.01	0.426	85.04	75.34	58.4148	36.7	0.944
6	Germany	121.85	0.710396	4.61	4.46	1.81	2.11	0.41	0.53	b.d.	0.381	81.86	74.14	69.5438	35	0.944
7	Estonia	109.5	0.269204	8.71	8.64	2.86	0.6	0.15	0.51	0.02	0.301	79.47	68.08	100	35.2	0.887
8	Ireland	98.89	0.691942	7.78	7.48	1.76	0.93	0.05	0.27	b.d.	0.387	80.35	59.79	58.1256	41.6	0.934
9	Greece	76.62	0.521805	10.24	9.52	4.03	0.56	0.26	0.33	0.01	0.398	74.97	63.83	51.6318	36	0.88
10	Spain	105.04	0.90178	5.42	5.31	1.84	0.66	0.21	0.33	0	0.536	78.15	67.94	62.4757	38.1	0.897
11	France	117.72	0.822618	4.98	4.78	2.31	1.44	0.27	0.45	0.03	0.525	80.48	69.68	38.0317	35.2	0.898
12	Croatia	73.92	0.492638	9.41	9.36	3.46	0.41	0.19	0.25	b.d.	0.722	77.43	68.45	b.d.	34.1	0.852
13	Italy	118.65	0.796415	7.99	7.93	3.34	0.85	0.17	0.32	0.02	0.543	77.34	70.89	53.0167	34.9	0.888
14	Cyprus	73.7	0.549025	9.03	9.03	2.97	0.2	0.05	0.22	0.06	0.324	73.45	57.99	b.d.	34.7	0.887
15	Latvia	99.44	0.249675	11.23	11.1	3.49	0.14	0.13	0.24	b.d.	0.577	79.06	68.11	81.0569	37	0.86
16	Lithuania	85.48	0.222022	6.49	6.42	1.91	0.33	0.25	0.32	b.d.	0.359	75.27	68.44	76.6144	41.3	0.876
17	Luxembourg	162.91	0.733592	4.45	4.3	1.64	0.69	0.3	0.25	b.d.	b.d.	74.71	67.85	79.0686	34.7	0.919
18	Hungary	58.93	0.433041	6.43	6.42	2.44	0.96	0.17	0.18	b.d.	0.777	78.02	69.83	72.2718	33.9	0.845
19	Malta	68.55	0.559636	8.4	8.16	2.54	0.36	0.01	0.19	b.d.	0.575	74.73	50.46	b.d.	32	0.901
20	Netherlands	104.34	0.740117	8.63	8.52	3.34	1.45	0.12	0.61	0	0.316	79.64	65.97	73.8108	32.6	0.937
21	Austria	148.9	0.608674	5.71	5.63	2.39	2.14	0.22	0.69	0.02	0.256	81.68	77.16	69.6868	33.8	0.916
22	Poland	56.52	0.467323	7.85	7.64	2.69	0.67	0.02	0.34	0	0.44	80.63	65.39	59.5832	33.6	0.875
23	Portugal	92.75	0.700191	7.56	7.06	2.58	0.67	0.07	0.56	0.02	0.646	78.17	69.08	53.5041	36.9	0.859
24	Romania	87.39	0.278156	7.78	7.51	1.95	0.29	0.16	0.05	0	0.714	76.58	67.58	b.d.	36.5	0.823
25	Slovenia	98.29	0.356696	9.84	9.77	3.67	1.39	0.26	0.21	0	0.488	79.74	67.88	65.7735	29.3	0.913
26	Slovakia	87.24	0.288671	7.51	7.46	2.54	0.48	0.18	0.22	0	0.296	77.73	73.62	72.9416	26.2	0.856
27	Finland	181.55	0.646876	6.9	6.88	2.96	1.78	0.23	0.69	0.02	0.247	86.34	71.86	64.8717	34.3	0.934
28	Sweden	161.08	0.780494	4.8	4.73	2.11	2.4	0.12	0.84	0	0.33	85.24	76.19	71.4917	36.7	0.941
	b.d. = brak danych

## Sheet: 2018
		1-Eco-Innovation Index	2-FDI	3 - Share of environmental taxes in total tax revenues [SDG_17_50]	3b - Environmental tax revenues [ENV_AC_TAX]		4 - Gross domestic expenditure on R&D by sector [SDG_09_10]				5-Sustainable Development Index (SDI)	5b-SDG Index	6-Green Growth Index	7-International Tax Competitiveness Index	8-Gini coefficient of equivalized disposable income before social transfers (pensions excluded from social transfers)	9-Human Development Index
			Financial Development Index	Share of environmental taxes in total revenues from taxes and social contributions	Percentage of total revenues from taxes and social contributions (including imputed social contributions)	Percentage of gross domestic product (GDP)	Business enterprise sector	Government sector	Higher education sector	Private non-profit sector					Gini coefficient (scale from 0 to 100)
				%	%	%	% of GDP	% of GDP	% of GDP	% of GDP	-	-	-	-	0 - 100	-
1	European Union	109.44	0.508032	5.99	5.83	2.4	1.45	0.25	0.47	0.01	b.d.	b.d.	b.d.	b.d.	35.9	b.d.
2	Belgium	90.53	0.664866	6.02	5.72	2.7	2.05	0.26	0.53	0.02	0.334	79.09	63.75	66.5302	32.7	0.933
3	Bulgaria	36.94	0.371167	8.81	8.81	2.62	0.54	0.17	0.04	0	0.678	73.34	63.62	b.d.	43.3	0.809
4	Czechia	100.39	0.463618	5.44	5.44	1.96	1.18	0.31	0.41	0	0.417	79.85	74.88	82.4142	27.3	0.894
5	Denmark	156.5	0.672406	8.15	8.01	3.62	1.87	0.09	1	0.01	0.386	85.13	75.46	59.0891	36	0.942
6	Germany	123.16	0.724993	4.45	4.3	1.77	2.14	0.42	0.55	b.d.	0.366	81.87	74.12	70.923	36.6	0.945
7	Estonia	98.79	0.279869	8.31	8.25	2.73	0.6	0.16	0.63	0.02	0.27	79.95	67.72	100	34.1	0.891
8	Ireland	101.26	0.671306	7.01	6.76	1.57	0.85	0.05	0.27	b.d.	0.364	80.29	59.62	59.6763	39.3	0.937
9	Greece	73.1	0.488716	9.49	8.9	3.8	0.58	0.27	0.34	0.01	0.434	76.14	63.66	51.8604	35.2	0.886
10	Spain	107.65	0.84326	5.28	5.18	1.83	0.7	0.21	0.33	0	0.465	78.92	68.13	62.2509	37	0.901
11	France	116.09	0.80908	5.13	4.93	2.37	1.44	0.27	0.45	0.03	0.511	80.75	70.34	39.9964	34.9	0.901
12	Croatia	75.74	0.481179	9.38	9.33	3.5	0.46	0.19	0.3	b.d.	0.724	78.08	68.09	b.d.	33.8	0.856
13	Italy	127.06	0.765037	7.94	7.89	3.31	0.9	0.18	0.32	0.02	0.531	78.07	70.55	51.8332	35.7	0.893
14	Cyprus	73.62	0.533851	8.55	8.55	2.83	0.25	0.05	0.25	0.07	0.348	73.84	58.69	b.d.	34	0.892
15	Latvia	97.75	0.245454	10.87	10.74	3.37	0.16	0.15	0.33	b.d.	0.487	79.6	67.76	85.4415	38.2	0.866
16	Lithuania	81.73	0.215758	6.58	6.51	1.98	0.39	0.21	0.34	b.d.	0.304	74.59	68.3	77.9054	40.6	0.88
17	Luxembourg	171.95	0.730185	4.33	4.19	1.71	0.62	0.3	0.24	b.d.	b.d.	74.52	67.43	80.6245	37.5	0.922
18	Hungary	64.79	0.427723	6.16	6.16	2.27	1.14	0.16	0.19	b.d.	0.737	78.27	69.19	75.1978	34.1	0.849
19	Malta	93.54	0.532861	8.2	7.98	2.48	0.36	0.01	0.21	b.d.	0.583	76.12	50.2	b.d.	32.1	0.91
20	Netherlands	109.65	0.728356	8.62	8.51	3.34	1.42	0.13	0.59	0	0.292	79.68	65.97	75.1373	32.7	0.939
21	Austria	153.12	0.629835	5.39	5.32	2.28	2.16	0.22	0.69	0.02	0.248	81.74	77.28	70.6529	32.9	0.917
22	Poland	59.07	0.439498	7.7	7.52	2.7	0.8	0.02	0.38	0	0.438	80.2	66.29	59.2813	32.7	0.877
23	Portugal	97.27	0.679882	7.41	6.95	2.57	0.69	0.07	0.56	0.02	0.648	78.33	68.99	53.2395	35.2	0.86
24	Romania	83.95	0.275472	7.59	7.35	1.96	0.3	0.15	0.05	0	0.702	77.15	67.75	b.d.	38	0.827
25	Slovenia	97.02	0.345924	9.08	9.01	3.4	1.44	0.26	0.23	0.01	0.475	79.59	67.65	67.0468	28.8	0.917
26	Slovakia	85.59	0.284471	7.31	7.27	2.48	0.45	0.18	0.2	0	0.296	77.81	73.21	75.8443	24.3	0.859
27	Finland	169.91	0.625606	6.92	6.9	2.93	1.81	0.23	0.7	0.02	0.232	85.89	71.44	66.3493	34.4	0.936
28	Sweden	163.96	0.777656	4.76	4.69	2.09	2.36	0.12	0.84	0	0.305	85.06	76.16	72.9748	35.7	0.942
	b.d. = brak danych

## Sheet: 2019
		1-Eco-Innovation Index	2-FDI	3 - Share of environmental taxes in total tax revenues [SDG_17_50]	3b - Environmental tax revenues [ENV_AC_TAX]		4 - Gross domestic expenditure on R&D by sector [SDG_09_10]				5-Sustainable Development Index (SDI)	5b-SDG Index	6-Green Growth Index	7-International Tax Competitiveness Index	8-Gini coefficient of equivalized disposable income before social transfers (pensions excluded from social transfers)	9-Human Development Index
			Financial Development Index	Share of environmental taxes in total revenues from taxes and social contributions	Percentage of total revenues from taxes and social contributions (including imputed social contributions)	Percentage of gross domestic product (GDP)	Business enterprise sector	Government sector	Higher education sector	Private non-profit sector					Gini coefficient (scale from 0 to 100)
				%	%	%	% of GDP	% of GDP	% of GDP	% of GDP	-	-	-	-	0 - 100	-
1	European Union	111.05	0.501857	5.89	5.74	2.35	1.48	0.25	0.48	0.01	b.d.	b.d.	b.d.	b.d.	35.5	b.d.
2	Belgium	91.15	0.658217	6.07	5.76	2.64	2.33	0.28	0.53	0.02	0.321	79.47	64.19	67.7304	32.7	0.936
3	Bulgaria	39.13	0.373462	9.85	9.85	2.99	0.56	0.21	0.06	0.01	0.666	73.9	63.95	b.d.	44.1	0.81
4	Czechia	103.65	0.461999	5.67	5.67	2.04	1.19	0.31	0.42	0.01	0.399	80	75.13	84.1599	27.4	0.897
5	Denmark	157.4	0.670426	7.02	6.9	3.3	1.84	0.09	1	0.01	0.37	85.39	75.99	60.5014	35.7	0.946
6	Germany	128.37	0.701135	4.39	4.25	1.76	2.18	0.43	0.55	b.d.	0.351	81.94	75.08	73.42	35.2	0.948
7	Estonia	98.65	0.260875	9.57	9.49	3.2	0.87	0.17	0.58	0.02	0.26	80.54	68.23	100	34.7	0.896
8	Ireland	100.44	0.65965	6.42	6.19	1.41	0.91	0.05	0.27	b.d.	0.35	80.65	59.9	61.6248	38.9	0.942
9	Greece	92.07	0.491577	9.79	9.23	3.86	0.59	0.29	0.39	0.01	0.417	76.5	64.44	56.9472	34.3	0.889
10	Spain	106.56	0.813808	5.09	4.99	1.77	0.7	0.21	0.33	0	0.443	79.43	68.31	65.1988	36.6	0.908
11	France	122.33	0.808715	5.1	4.9	2.31	1.44	0.27	0.44	0.04	0.49	81.12	70.73	42.7001	35.2	0.905
12	Croatia	79.01	0.480476	9.22	9.17	3.44	0.53	0.2	0.35	b.d.	0.714	78.18	68.14	b.d.	33	0.861
13	Italy	117.72	0.766289	7.7	7.65	3.24	0.92	0.18	0.33	0.03	0.51	77.94	70.9	53.3974	35.3	0.897
14	Cyprus	85.98	0.532619	7.37	7.37	2.52	0.3	0.05	0.27	0.08	0.334	73.69	59.59	b.d.	34.2	0.897
15	Latvia	97.8	0.215623	9.58	9.43	2.93	0.17	0.12	0.35	b.d.	0.465	79.86	68.86	88.7586	38	0.871
16	Lithuania	87.79	0.204111	6.23	6.16	1.88	0.43	0.2	0.36	b.d.	0.293	74.9	68.53	80.2283	39.7	0.884
17	Luxembourg	175.5	0.729373	4.43	4.28	1.75	0.64	0.28	0.26	b.d.	b.d.	75.11	67.81	81.2575	37.5	0.927
18	Hungary	63.97	0.436461	6.22	6.21	2.26	1.11	0.15	0.21	b.d.	0.728	78.59	69.71	78.7578	30.3	0.853
19	Malta	79.84	0.530291	8.25	8.05	2.44	0.35	0.01	0.21	b.d.	0.563	76.36	50.65	b.d.	31.2	0.915
20	Netherlands	112.29	0.680782	8.64	8.53	3.39	1.46	0.12	0.6	0	0.282	79.68	66.18	74.5155	32	0.943
21	Austria	156.52	0.612207	5.35	5.28	2.28	2.2	0.23	0.68	0.02	0.239	82.27	77.74	73.0223	33.8	0.919
22	Poland	60.98	0.430384	7.23	7.06	2.54	0.83	0.02	0.47	0	0.42	80.57	66.61	61.2588	32.8	0.881
23	Portugal	98.43	0.654914	7.33	6.88	2.53	0.73	0.07	0.56	0.03	0.634	78.69	69.48	54.2173	34.7	0.867
24	Romania	77.61	0.258681	8.14	7.91	2.11	0.28	0.15	0.05	0	0.692	77.47	67.91	b.d.	37.3	0.832
25	Slovenia	100.39	0.376974	8.9	8.83	3.33	1.51	0.28	0.24	0.01	0.455	79.81	67.88	68.7423	29.1	0.921
26	Slovakia	79.08	0.283706	7.28	7.23	2.5	0.45	0.16	0.21	0	0.285	78.01	74.09	75.4324	26.4	0.862
27	Finland	169.41	0.641869	6.63	6.62	2.81	1.84	0.23	0.71	0.02	0.225	86.18	71.66	69.204	34.2	0.939
28	Sweden	168.19	0.733101	4.79	4.71	2.05	2.43	0.15	0.8	0	0.294	85.12	76.61	74.7281	36	0.947
	b.d. = brak danych

## Sheet: 2020
		1-Eco-Innovation Index	2-FDI	3 - Share of environmental taxes in total tax revenues [SDG_17_50]	3b - Environmental tax revenues [ENV_AC_TAX]		4 - Gross domestic expenditure on R&D by sector [SDG_09_10]				5-Sustainable Development Index (SDI)	5b-SDG Index	6-Green Growth Index	7-International Tax Competitiveness Index	8-Gini coefficient of equivalized disposable income before social transfers (pensions excluded from social transfers)	9-Human Development Index
			Financial Development Index	Share of environmental taxes in total revenues from taxes and social contributions	Percentage of total revenues from taxes and social contributions (including imputed social contributions)	Percentage of gross domestic product (GDP)	Business enterprise sector	Government sector	Higher education sector	Private non-profit sector					Gini coefficient (scale from 0 to 100)
				%	%	%	% of GDP	% of GDP	% of GDP	% of GDP	-	-	-	-	0 - 100	-
1	European Union	112.39	0.502695	5.57	5.42	2.23	1.51	0.27	0.51	0.02	b.d.	b.d.	b.d.	b.d.	34.9	b.d.
2	Belgium	93.37	0.64076	5.8	5.48	2.52	2.48	0.28	0.57	0.03	b.d.	79.68	64.33	69.6388	32.7	0.928
3	Bulgaria	44.41	0.376845	9.89	9.89	3.02	0.57	0.22	0.05	0.01	b.d.	74.25	63.92	b.d.	43.2	0.802
4	Czechia	104.86	0.452104	5.35	5.34	1.92	1.21	0.34	0.43	0.01	b.d.	80.39	75.14	85.4604	27.5	0.892
5	Denmark	164.11	0.658965	6.71	6.6	3.17	1.82	0.1	1.02	0.01	b.d.	85.4	76.1	60.1082	35.4	0.947
6	Germany	130.93	0.74515	4.26	4.11	1.69	2.09	0.46	0.59	b.d.	b.d.	82.28	75	72.3639	36.2	0.944
7	Estonia	106.8	0.279422	7.2	7.13	2.39	0.96	0.17	0.59	0.03	b.d.	80.56	68.26	100	34.9	0.892
8	Ireland	100.26	0.637843	6.05	5.8	1.2	0.91	0.04	0.28	b.d.	b.d.	80.65	59.95	61.1192	37.9	0.943
9	Greece	85.77	0.482215	9.69	9.11	3.76	0.7	0.32	0.48	0.01	b.d.	76.55	64.47	58.7716	34.5	0.886
10	Spain	108.56	0.826692	4.74	4.65	1.75	0.78	0.25	0.37	0	b.d.	79.68	68.34	64.362	35.5	0.899
11	France	125.06	0.80097	4.78	4.58	2.17	1.52	0.27	0.47	0.05	b.d.	81.15	70.93	43.3386	36.9	0.898
12	Croatia	83.27	0.478418	8.92	8.87	3.27	0.6	0.25	0.4	b.d.	b.d.	78.86	68.06	b.d.	31.6	0.855
13	Italy	121.57	0.773186	7.14	7.09	3.04	0.93	0.2	0.35	0.03	b.d.	78.47	70.88	50.6281	35.2	0.889
14	Cyprus	78.23	0.494564	6.98	6.98	2.37	0.37	0.05	0.3	0.11	b.d.	74.13	59.35	b.d.	32.4	0.894
15	Latvia	97.15	0.209172	9.81	9.68	3.02	0.21	0.13	0.35	b.d.	b.d.	79.95	68.87	89.9278	37.2	0.871
16	Lithuania	92.77	0.20517	6.23	6.16	1.92	0.53	0.18	0.42	b.d.	b.d.	75.17	68.57	77.5205	39.5	0.879
17	Luxembourg	174.72	0.740474	3.61	3.49	1.38	0.54	0.28	0.26	b.d.	b.d.	75.62	68.01	81.1119	37.8	0.924
18	Hungary	65.21	0.458992	6.01	6	2.16	1.22	0.16	0.21	b.d.	b.d.	78.76	69.74	78.6054	31.4	0.849
19	Malta	79.22	0.533606	7.68	7.49	2.25	0.42	0.01	0.23	b.d.	b.d.	76.65	50.72	b.d.	33.5	0.911
20	Netherlands	118.23	0.669782	7.99	7.9	3.18	1.54	0.13	0.64	0	b.d.	79.97	66.06	72.0345	33	0.939
21	Austria	159.63	0.62095	4.97	4.91	2.09	2.23	0.24	0.72	0.02	b.d.	82.21	77.78	70.6718	33	0.913
22	Poland	60.49	0.451177	7.12	6.95	2.53	0.87	0.03	0.48	0	b.d.	80.19	66.65	60.5999	31.1	0.876
23	Portugal	98.31	0.6527	6.71	6.29	2.36	0.92	0.08	0.58	0.03	b.d.	78.97	69.54	54.033	34.1	0.863
24	Romania	80.5	0.268102	7.3	7.07	1.9	0.27	0.15	0.04	0	b.d.	77.57	68.01	b.d.	36.3	0.824
25	Slovenia	106.81	0.337132	7.85	7.78	2.94	1.57	0.29	0.26	0.02	b.d.	80.1	67.74	68.448	28.6	0.913
26	Slovakia	85.48	0.282725	7.1	7.04	2.46	0.49	0.18	0.24	0	b.d.	78.47	74.05	74.4023	24.9	0.857
27	Finland	170.55	0.64195	6.51	6.5	2.73	1.95	0.22	0.72	0.02	b.d.	86.42	71.69	68.4398	34.3	0.938
28	Sweden	163.91	0.7243	4.72	4.64	2	2.52	0.15	0.81	0	b.d.	85.29	76.63	73.8667	35.3	0.942
	b.d. = brak danych

## Sheet: 2021
		1-Eco-Innovation Index	2-FDI	3 - Share of environmental taxes in total tax revenues [SDG_17_50]	3b - Environmental tax revenues [ENV_AC_TAX]		4 - Gross domestic expenditure on R&D by sector [SDG_09_10]				5-Sustainable Development Index (SDI)	5b-SDG Index	6-Green Growth Index	7-International Tax Competitiveness Index	8-Gini coefficient of equivalized disposable income before social transfers (pensions excluded from social transfers)	9-Human Development Index
			Financial Development Index	Share of environmental taxes in total revenues from taxes and social contributions	Percentage of total revenues from taxes and social contributions (including imputed social contributions)	Percentage of gross domestic product (GDP)	Business enterprise sector	Government sector	Higher education sector	Private non-profit sector					Gini coefficient (scale from 0 to 100)
				%	%	%	% of GDP	% of GDP	% of GDP	% of GDP	-	-	-	-	0 - 100	-
1	European Union	115.84	b.d.	5.52	5.38	2.24	1.49	0.27	0.49	0.01	b.d.	b.d.	b.d.	b.d.	35.9	b.d.
2	Belgium	94.35	b.d.	5.72	5.43	2.5	2.42	0.28	0.49	0.02	b.d.	79.68	64.33	65.4308	32.9	0.937
3	Bulgaria	55.85	b.d.	9.06	9.06	2.78	0.51	0.21	0.05	0	b.d.	74.28	63.93	b.d.	43.9	0.795
4	Czechia	109.86	b.d.	5.12	5.11	1.84	1.25	0.33	0.41	0.01	b.d.	80.41	75.13	84.2821	28.7	0.889
5	Denmark	160.93	b.d.	6	5.91	2.88	1.75	0.1	0.96	0.01	b.d.	85.61	76.08	57.0389	35.7	0.948
6	Germany	135.76	b.d.	4.38	4.23	1.8	2.09	0.47	0.57	b.d.	b.d.	82.16	75.01	71.5018	38.1	0.942
7	Estonia	111.65	b.d.	6.81	6.75	2.28	0.98	0.16	0.59	0.02	b.d.	80.51	68.27	100	35.1	0.89
8	Ireland	100.82	b.d.	5.51	5.31	1.16	0.84	0.04	0.17	b.d.	b.d.	80.64	59.95	60.4556	38.3	0.945
9	Greece	93.32	b.d.	9.98	9.47	3.93	0.69	0.32	0.44	0.01	b.d.	76.72	64.46	58.5805	35.7	0.887
10	Spain	112.88	b.d.	4.59	4.52	1.76	0.8	0.24	0.38	0	b.d.	79.84	68.33	58.8608	38.3	0.905
11	France	124.64	b.d.	4.82	4.63	2.18	1.45	0.27	0.45	0.04	b.d.	81.22	70.93	44.9831	37.4	0.903
12	Croatia	86.1	b.d.	8.75	8.7	3.12	0.58	0.26	0.4	b.d.	b.d.	78.73	68.07	b.d.	32.3	0.858
13	Italy	125.31	b.d.	6.93	6.88	3	0.91	0.2	0.35	0.03	b.d.	78.31	70.89	48.9797	37.2	0.895
14	Cyprus	93.26	b.d.	6.5	6.5	2.34	0.41	0.05	0.29	0.12	b.d.	74.2	59.35	b.d.	32.6	0.896
15	Latvia	102.07	b.d.	8.97	8.85	2.73	0.23	0.14	0.33	b.d.	b.d.	80.05	68.85	90.1946	38.5	0.863
16	Lithuania	98.48	b.d.	5.77	5.72	1.86	0.54	0.17	0.39	b.d.	b.d.	75.3	68.57	77.3208	40.5	0.875
17	Luxembourg	173.05	b.d.	3.75	3.63	1.45	0.47	0.29	0.26	b.d.	b.d.	75.65	67.99	80.8813	35.4	0.93
18	Hungary	69.56	b.d.	5.94	5.93	2.01	1.24	0.17	0.23	b.d.	b.d.	78.85	69.75	78.2619	32.3	0.846
19	Malta	78.79	b.d.	6.46	6.31	1.93	0.4	0.01	0.23	b.d.	b.d.	76.82	50.72	b.d.	34.5	0.918
20	Netherlands	116.03	b.d.	7.77	7.68	3.09	1.52	0.13	0.61	0	b.d.	79.83	66.04	71.9871	32.1	0.941
21	Austria	157.23	b.d.	4.99	4.94	2.16	2.22	0.24	0.71	0.02	b.d.	82.18	77.78	70.5888	33.5	0.916
22	Poland	63.88	b.d.	7.84	7.66	2.89	0.91	0.03	0.5	0	b.d.	80.47	66.66	59.4641	30.6	0.876
23	Portugal	104.57	b.d.	6.63	6.22	2.34	1	0.08	0.56	0.04	b.d.	79.2	69.54	53.2545	35.9	0.866
24	Romania	81.49	b.d.	7.43	7.21	1.96	0.29	0.14	0.04	0	b.d.	77.58	68.01	b.d.	36.6	0.821
25	Slovenia	111.03	b.d.	7.29	7.22	2.78	1.57	0.29	0.26	0.02	b.d.	79.84	67.68	67.2842	28	0.918
26	Slovakia	88.05	b.d.	6.74	6.68	2.42	0.52	0.17	0.24	0	b.d.	78.39	74.04	74.8096	26.6	0.848
27	Finland	170.89	b.d.	5.81	5.8	2.5	2.06	0.22	0.69	0.02	b.d.	86.48	71.69	67.81	34.2	0.94
28	Sweden	157.59	b.d.	4.45	4.37	1.9	2.41	0.15	0.79	0	b.d.	85.15	76.64	74.1885	35.5	0.947
	b.d. = brak danych
